# Supplementary material for: Whole-body magnetic resonance imaging in children – how and why? A systematic review
Source: PubMed Central journal article supplement (PMC7796873; doi:10.1007/s00247-020-04735-9), 2020-06-25
Supplement: 247_2020_4735_MOESM1_ESM.pdf [file 247_2020_4735_MOESM1_ESM.pdf]

## Supplementary 1

### **Ovid MEDLINE(R) and Epub Ahead of Print, In-Process & Other Non-Indexed Citations and Daily <1946 to November 02, 2018> Search date 5. Nov. 2018**

- 1 Whole Body Imaging/ (4371)
- 2 ((whole body or wholebody or whole-body or full body or entire body or complete body or total body or full-length or uncut) adj3 (magnetic resonance imaging or MRI or MR imaging or MR-imaging or NMR or tomography MR or MR tomography)).ti,ab,kw. (1818)
- 3 Magnetic Resonance Imaging/ (362220)
- 4 (whole body or wholebody or whole-body or full body or entire body or complete body or total body or full-length or uncut).ti,ab,kw. (151508)
- 5 1 or 4 (153445)
- 6 3 and 5 (3815)
- 7 2 or 6 (4509)
- 8 adolescent/ or exp child/ or exp infant/ (3339152)
- 9 (child\* or adolescen\* or teen\* or kids or youth\* or preschool or infant\* or newborn or paediatric\* or pediatric\*).ti,ab,kw. (1926848)
- 10 8 or 9 (3836142)
- 11 7 and 10 (786)

### **Embase (OVID) <1974 to 2018 November 02>. Search date 5. Nov. 2018**

- 1 whole body mri/ (2247)
- 2 ((whole body or wholebody or whole-body or full body or entire body or complete body or total body or full-length or uncut) adj3 (magnetic resonance imaging or MRI or MR imaging or MR-imaging or NMR or tomography MR or MR tomography)).ti,ab,kw. (3079)
- 3 1 or 2 (3922)
- 4 juvenile/ or adolescent/ or child/ (2307420)
- 5 (child\* or adolescen\* or teen\* or kids or youth\* or preschool or infant\* or newborn or paediatric\* or pediatric\*).ti,ab,kw. (2293593)
- 6 4 or 5 (3354785)
- 7 3 and 6 (776)

### **Cochrane (Wiley), Search date 5.nov.2018**

- #1 - MeSH descriptor: [Whole Body Imaging] explode all trees MeSH - 65
- #2 - ("whole body" or wholebody or whole-body or "full body" or "entire body" or "complete body" or "total body" or full-length or uncut):ti,ab,kw - (Word variations have been searched) S - 8829
- #3 - MeSH descriptor: [Magnetic Resonance Imaging] explode all trees MeSH - 7418
- #4 - (#1 or #2) and #3 - 119
- #5 - (("whole body" or wholebody or whole-body or "full body" or "entire body" or "complete body" or "total body" or full-length or uncut) NEAR/3 ("magnetic resonance imaging" or MRI or "MR imaging" or MR-imaging or NMR or "tomography MR" or "MR tomography")):ti,ab,kw - (Word variations have been searched) S - 141
- #6 - #4 or #5 - 221
- #7 - MeSH descriptor: [Infant] explode all trees MeSH - 15055
- #8 - MeSH descriptor: [Child] explode all trees - MeSH - 1422
- #9 - MeSH descriptor: [Adolescent] explode all trees MeSH - 97811

#10 - (child\* OR adolescen\* OR teen\* OR kids OR youth\* OR preschool OR infant\* OR newborn OR paediatric\* OR pediatric\*):ti,ab,kw - (Word variations have been searched) S - 224945

#11 - #7 or #8 or #9 or #10 - 224945

#12 - #6 and #11 - 45
